# Supplementary material
Source: publisher site journal article supplement (http://kjim.org/upload/media/kjim-2021-021-suppl7.pdf)
Supplement: Supplementary file 1 [file kjim-2021-021-suppl7.pdf]

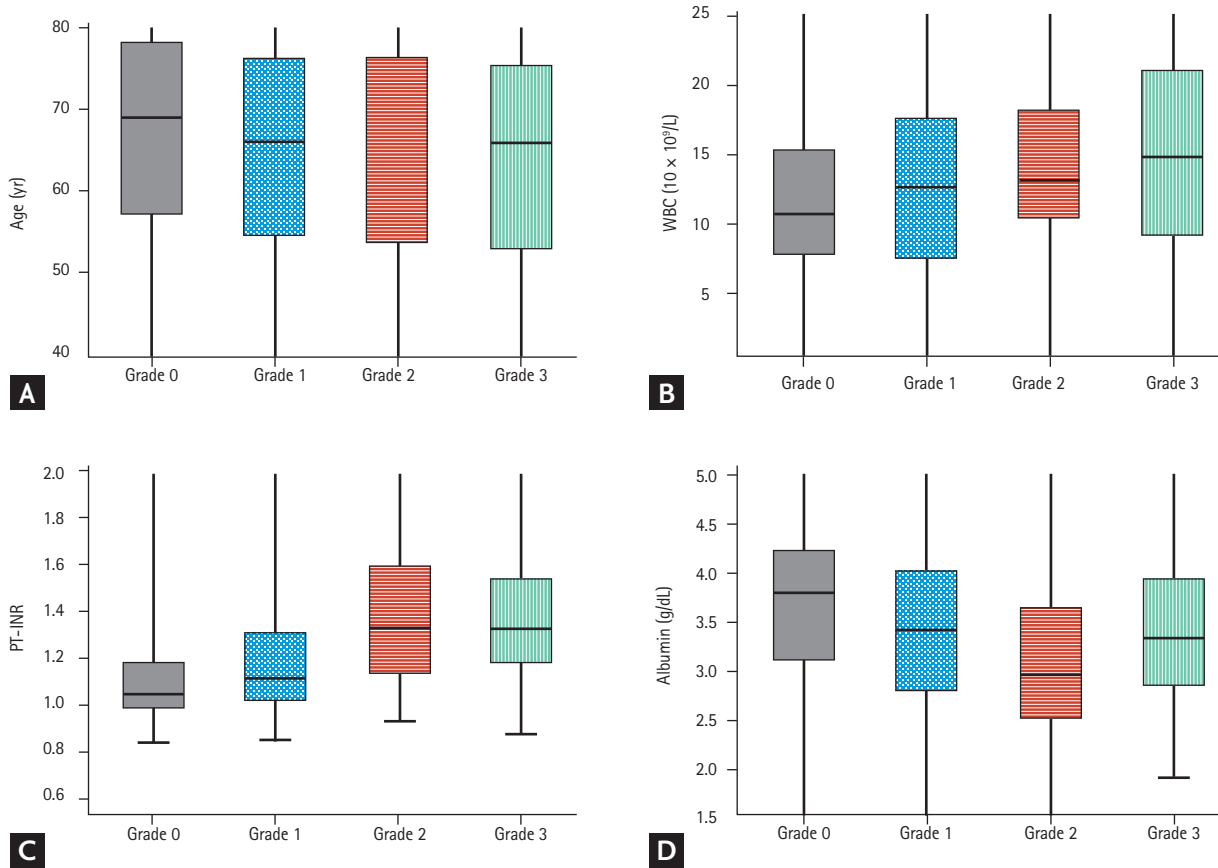

**Supplementary Figure 3.** Ages and laboratory parameters significantly associated with hyperammonemia in the different ammonia grades (n = 972). (A) Age, (B) white blood cell (WBC), (C) prothrombin time-international normalized ratio (PT-INR), and (D) albumin.
